# Supplementary material
Source: PubMed Central journal article supplement (PMC3339654)
Supplement: supp_en.2011-2119_EN-11-2119_supp_fig1.pdf [file supp_en.2011-2119_EN-11-2119_supp_fig1.pdf]

**Sup. Fig. 1**

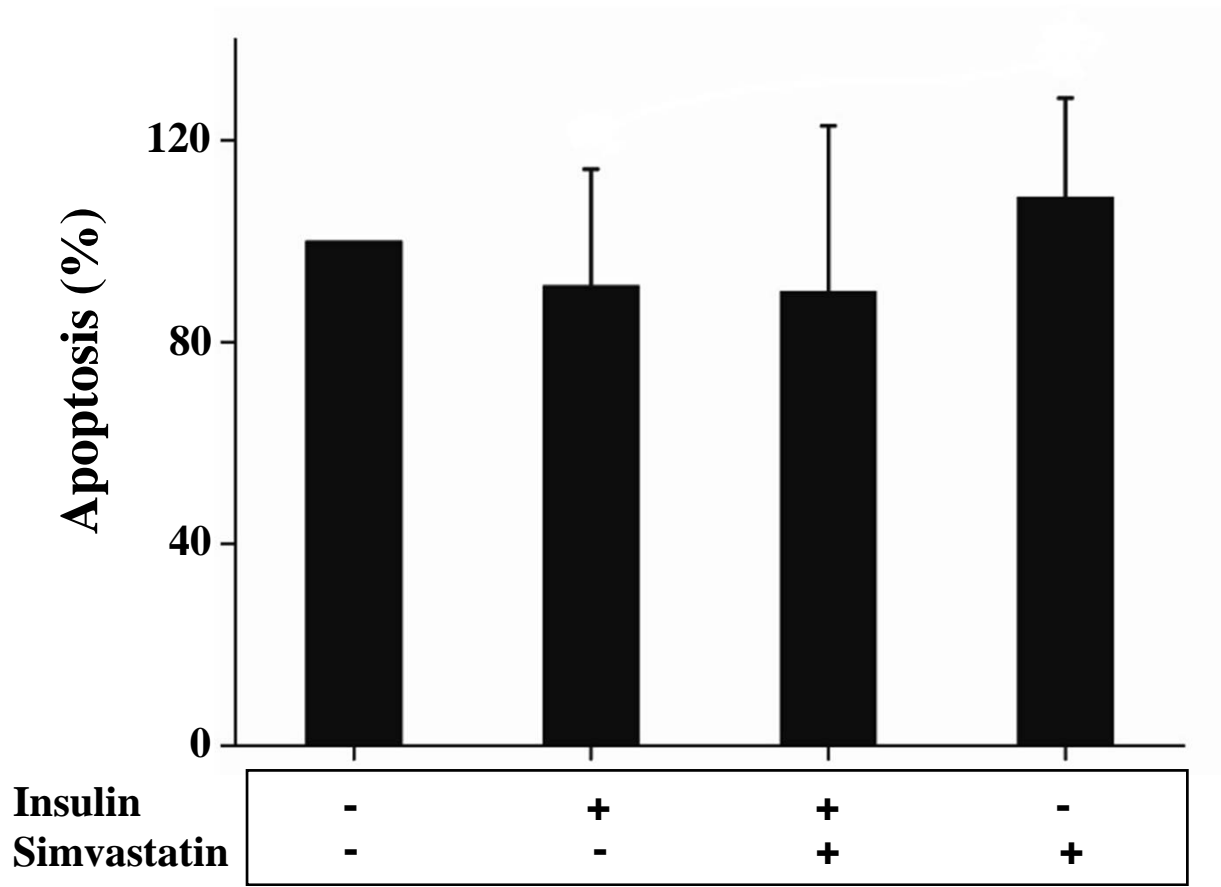

**Supl. Fig. 1. Prolonged exposure to insulin did not cause apoptosis in hepatocytes.** Levels of apoptosis in the cells described in Fig. 6 were determined with a commercialized kit from Roche and normalized to cells numbers. Results represent Mean  $\pm$  SD of 3 independent experiments.
